# Supplementary material for: Effects of High Pressure Processing and Thermal Treatment on the Interaction between α-Lactalbumin and Pelargonium-3-Glucoside
Source: MDPI journal article supplement (doi:10.3390/molecules27154944), 2022-08-03
Supplement: s1 [file s1]

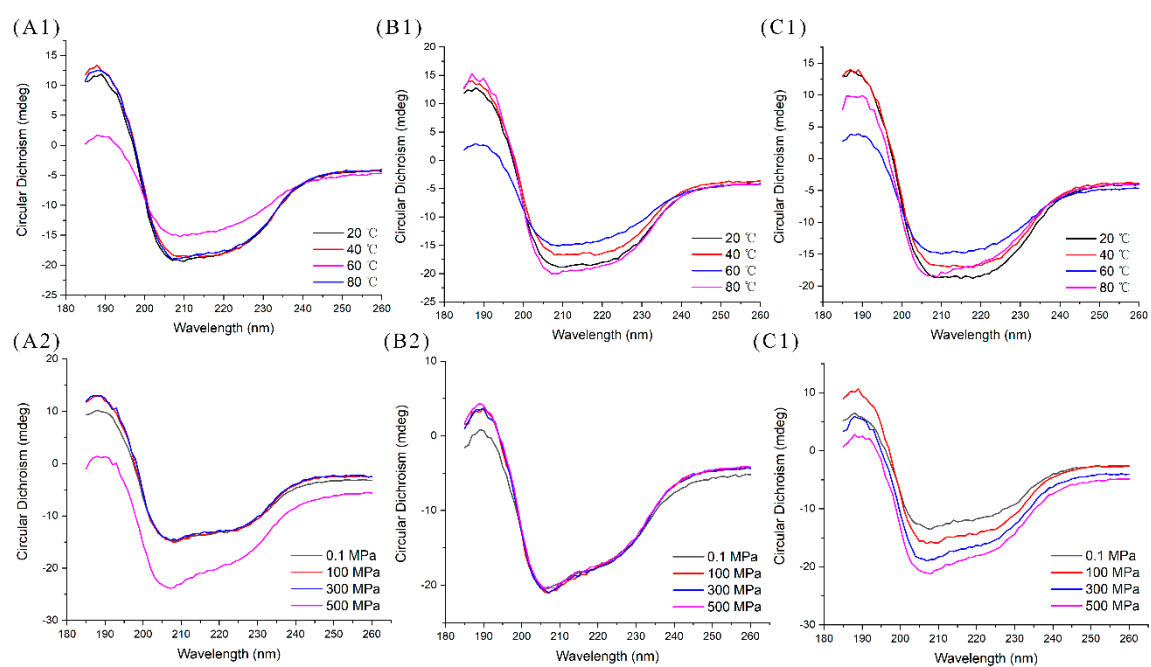

Figure S1. The circular dichroism spectroscopy of  $\alpha$ -Lactalbumin at different treatments (A-C: The circular dichroism spectroscopy of  $\alpha$ -Lactalbumin at pH of 6.0, 7.4 and 8.0, respectively; 1 and 2 referred the thermal treatment and high pressure processing, respectively.)
